# Supplementary material for: Role of Dimerized C16orf74 in Aggressive Pancreatic Cancer: A Novel Therapeutic Target
Source: Oxford University Press journal article supplement (doi:10.1158/1535-7163.mct-19-0491), 2019-10-09
Supplement: 15357163mct190491-sup-221936_3_supp_5811282_pyq7lf.docx [file 15357163mct190491-sup-221936_3_supp_5811282_pyq7lf.docx]

**Supplemental table 5. RT-PCR primers for construction of the expression vectors**

| *Construct* | | Forward | Reverse |
| --- | --- | --- | --- |
|  | pCAGGS-C16orf74-3×Flag | ATGGGGCTTAAGATGTCC | GGCTTCTGGGTCGATTTCTCC |
|  | pCAGGS-C16orf74-HA | ATGGGGCTTAAGATGTCC | GGCTTCTGGGTCGATTTCTCC |
|  | pCAGGS-ITG B1-HA | ATGAATTTACAACCAATTTTC | TTTTCCCTCATACTTCGGAT |
|  | pCAGGS-ITG B2-HA | ATGCTGGGCCTGCGC | ACTCTCAGCAAACTTG |
|  | pCAGGS-ITG B3-HA | AGGCGGACGAGATGCGAGCG | AGTGCCCCGGTACGTGA |
|  | pCAGGS-ITG B4-HA | ATGGCAGGGCCACGCCCCAG | AGTTTGGAAGAACTGTTG |
|  | pCAGGS-ILK-HA | ATGGACGACATTTTCACTCAGTGC | CTTGTCCTGCATCTTCTCAAGG |
|  | pCAGGS-PPP3CA-HA | ATGTCCGAGCCCAAGGCAATT | CTGAATATTGCTGCTATTACT |
|  | pCAGGS-PDK1-HA | ATGAGGCTGGCGCGGCTGCTTC | GGCACTGCGGAACGTCGTCATGTC |
|  | pCAGGS-PXN-HA | ATGGACGACCTCGACGCC | GCAGAAGAGCTTGAGGAAGC |
|  | pCAGGS-C16orf74 G2A  -3×Flag(G2A) | ATTGAATTCATGGCCCTTAAGATGTCCTG | CAGGACATCTTAAGGGCCATGAATTCAAT |
|  | pCAGGS-C16orf74 Δ2-15  -3×Flag(Δ2-15) | TTTGGCAAAGAATTGAATTCATGAGCAGCAGCAGCAGCAGC | CAGGACATCTTAAGGGCCATGAATTCAAT |
|  | pCAGGS-C16orf74 C7A_C14A  -3×Flag(C7A_C14A) | C7A_F:CTTAAGATGTCCGCCCTGAAAGGCTTTC | C7A_R:GAAAGCCTTTCAGGGC GGACATCTTAAG |
|  |  | C14A_F:GGCTTTCAAATGGCC GTCAGCAGCAGCAG | C14A_R:CTGCTGCTGCTGACGGCCATTTGAAAGCC |
|  | pCAGGS-C16orf74 T44A  -3×Flag(T44A) | CATCATCATCACGCCCCCCGCC CCCACGGGCATGATGCTGC | GCAGCATCATGCCCGTGGGGGCGGGGGGCGTGATGATGATG |
