# Supplementary material for: Role of Dimerized C16orf74 in Aggressive Pancreatic Cancer: A Novel Therapeutic Target
Source: Oxford University Press journal article supplement (doi:10.1158/1535-7163.mct-19-0491), 2019-10-09
Supplement: 15357163mct190491-sup-221936_3_supp_5811294_pyq7lf.docx [file 15357163mct190491-sup-221936_3_supp_5811294_pyq7lf.docx]

**Supplemental table 4. The antibodies and dilutions for Immunohistochemical staining**

| Immunohistochemistry | | | | |  |  |  |  | |
| --- | --- | --- | --- | --- | --- | --- | --- | --- | --- |
| Molecule | |  | Clone | Dilution | Retrieval | Manufacture | | |
|  | Ki67 | mMo | MIB-1 | 1:300 | EDTA pH9.0, 20min | Dako | | |
|  | mTOR | mRb | D9C2 | 1:100 | Citric acid pH 6.0, 10min | Cell signaling | | |
|  | Phospho-mTOR (Ser2448) | mRb | 49F9 | 1:100 | Citric acid pH 6.0, 10min | Cell signaling | | |
|  | AKT | mRb |  | 1:100 |  | Novocastra | | |
|  | Phospho-AKT | mRb | D9E | 1:100 |  | Cell signaling | | |

pRb: rabbit polyclonal, mRb: rabbit monoclonal, mMo: mouse monoclonal
